# Supplementary material for: Effect of β-blockers on mortality in patients with sepsis: A propensity-score matched analysis
Source: Front Cell Infect Microbiol. 2023 Mar 28;13:1121444. doi: 10.3389/fcimb.2023.1121444 (PMC10086225; doi:10.3389/fcimb.2023.1121444)
Supplement: Supplementary file 8 [file Table_6.docx]

**Table S7. Multivariate Cox regression analyses to identify the risks for 28-day mortality after PSM**

| Variables | HR (95%CI) | P value |
| --- | --- | --- |
| Age | 1 (1-1) | <0.001 |
| Heartrate | 1 (1-1) | <0.001 |
| Tachycardia a | 1.18 (1.11-1.22) | <0.001 |
| Septic shock | 0.95 (0.8-1.1) | 0.59 |
| Heart failure | 1.1 (0.96-1.2) | 0.22 |
| Arrhythmias | 1 (0.89-1.1) | 0.97 |
| AKI | 1.3 (1.1-1.5) | <0.001 |
| Cancer | 2.2 (1.9-2.6) | <0.001 |
| SOFA | 1.1 (1.1-1.1) | <0.001 |
| Lactate | 1.1 (1.1-1.1) | <0.001 |
| RRT | 0.89 (0.7-1.1) | 0.35 |
| Ventilation | 1.1 (0.97-1.3) | 0.14 |
| Vasopressor | 1.1 (0.95-1.3) | 0.18 |
| Gram-positive Bacteria | 1.3 (1.1-1.4) | 0.0012 |
| β-Blockers | 0.76 (0.68-0.85) | <0.001 |

*Abbreviations:* *PSM* propensity score matching, *HR* hazard ratio, *CI* confidence interval, *AKI* acute kidney injury, *SOFA* Sequential Organ Failure Assessment, *RRT* renal replacement therapy.

a Tachycardia defined as HR ≥100/min.
